# Supplementary material for: Long non-coding RNA BC002811 Promotes Gastric Cancer Metastasis by Regulating SOX2 Binding to the PTEN Promoter
Source: PubMed Central journal article supplement (PMC9909995; doi:10.7150/ijbs.76407), 2023-01-16
Supplement: ijbsv19p0967s1.pdf [file ijbsv19p0967s1.pdf]

# **Supplementary Material**

## **Supplementary Materials and Methods**

### **Human GC samples**

Fresh samples of human GC and corresponding adjacent non-tumorous tissues were obtained from 31 patients who underwent surgical resection in the Department of Gastrointestinal Surgery at Shenzhen People's Hospital (Shenzhen, China) between May 2013 and May 2015. None of the patients received chemotherapy or radiotherapy before the surgery. This investigation was sanctioned by the ethics committee of the Shenzhen People's Hospital. Written informed consent was obtained from all participants. All tissue samples were immediately frozen and stored in liquid nitrogen until needed for further testing.

### **Cell culture**

GES-1 and HGC-27 cells were obtained from Shanghai Cell Bank of the Chinese Academy of Sciences (Shanghai, China). AGS, Hs746T and NCI-N87 cells were obtained from the American Type Culture Collection (Manassas, VA, USA). GES-1 cells were cultured in DMEM medium (Gibco, Carlsbad, CA, USA); AGS, HGC-27, Hs746T and NCI-N87 cells were maintained in RPMI 1640 medium (Gibco) supplemented with 10% fetal bovine serum (HyClone, Logan, UT) at 37 °C in 5% CO<sub>2</sub>.

### **RNA extraction and quantitative real-time PCR (qPCR)**

Total RNA was isolated with Trizol reagent (Invitrogen, Carlsbad, CA, USA) and reverse transcribed into cDNA using an M-MLV reverse transcriptase kit (Promega, Mannheim, Germany) according to the respective manufacturer's instructions. QPCR was performed on ABI Prism 7500 Real-Time PCR System (Applied Biosystems, Foster, CA, USA) using Platinum SYBR Green qPCR SuperMix-UDG Kits (Invitrogen) following the protocols provided by the manufacturer. Cycling conditions

were 95 °C for 10min (initial denature), followed by 40 cycles at 95 °C for 10 sec and 60 °C for 1 min. All primers sequences used in this study were shown in Table S1. Relative expression was calculated by using the comparative  $2^{-\Delta\Delta C_t}$  method.

### **SiRNAs, plasmids transfection and establishment of stable cell lines**

BC002811 siRNA and scrambled siRNA (Table S1) were designed and synthesized by Sigma-Aldrich (St. Louis, MO, USA). BC002811 expression vector, BC002811 shRNA vector, PTEN expression vector and SOX2 expression vector were purchased from Land Unicomed (Guangzhou, China). Transfection of plasmid vectors was conducted using Lipofectamine 2000 reagent (Invitrogen), while siRNAs were transfected using RNAiMax (Invitrogen) according to the manufacturer's instructions. For stable knockdown of BC002811, GC cells were infected with lentivirus-mediated shRNA targeting BC002811. To obtain cell lines stably expressing BC002811, cells were infected with lentivirus expressing BC002811. All infected GC cells were selected with 4µg/ml puromycin for 2 weeks.

### **Cell proliferation assay**

For cell viability assay, GC cells were seeded onto 96-well plates ( $1 \times 10^4$  cells per well) after transfection, and cell viability was monitored every 24 h at a wavelength of 490 nm using a CellTiter96AQ Cell Proliferation Assay kit (MTS) (Promega) following the manufacturer's standard workflow. For colony formation assay, 200 transfected cells were plated into each well of 6-well plates and cultured in complete medium. Approximately 7 days later, the cells were fixed with 4% paraformaldehyde and stained with 0.1% crystal violet (Beyotime, Shanghai, China). Visible colonies were then counted under a microscope and the colony formation efficiency (CFE) was calculated as previously described by Lawrenson et al (Lawrenson K, Grun B, Benjamin E, Jacobs IJ, Dafou D, Gayther SA. Senescent fibroblasts promote neoplastic transformation of partially transformed ovarian epithelial cells in a three-dimensional model of early stage ovarian cancer. *Neoplasia*. 2010 Apr;12(4):317-25.).

### **Flow cytometric analysis of apoptosis**

Cell apoptosis assay was performed on FACSCalibur flow cytometer (BD Biosciences, Sparks, MD, USA) using Annexin V-PE/7-AAD Apoptosis Detection Kit (Solarbio, Beijing, China) according to the manufacturer's directions. Briefly, GC cells were harvested and resuspended in binding buffer at a concentration of  $1 \times 10^6$  cells/ml. This suspension (500  $\mu$ l) was incubated with 5  $\mu$ l of Annexin V-PE and 10  $\mu$ l of 7-AAD in the dark at room temperature for 15 min, followed immediately by flow cytometric analysis.

### **Cell migration and invasion assays**

For migration assay,  $1 \times 10^5$  GC cells were suspended in 100  $\mu$ l serum-free medium and seeded on the membrane of the upper chamber of 24-well Transwell plates (Corning, NY, USA) at 24 h post-transfection. For invasion assay, GC cells ( $1 \times 10^5$ ) in serum-free media were placed into the upper chamber of Transwell plates pre-coated with Matrigel (BD Biosciences, San Jose, CA, USA). Subsequently, 600  $\mu$ l of complete medium was added to the lower chamber. After 24 h, the cells on the upper membrane were gently scraped away using cotton wool, whereas the cells on the lower membrane were fixed with 4% paraformaldehyde and stained with 0.1% crystal violet (Beyotime) followed by microscopic observation and cell count.

### **Western blot analysis**

Cells were lysed in western and IP lysis buffer (Beyotime) supplemented with phenylmethylsulfonyl fluoride (Roche, CA, USA). The protein concentration was measured using the BCA Protein Assay Kit (KeyGEN Biotech, Nanjing, China). Equal amounts of protein were separated by SDS-PAGE and transferred onto a polyvinylidene fluoride (PVDF) membrane (Millipore, Billerica, MA, USA). The membranes were blocked in Western blocking buffer (Beyotime) for 1 h at room temperature, followed by incubation with primary antibodies overnight at 4 °C. After three 10-min washes in Tris-buffered saline solution with Tween (TBST), the

membranes were incubated with horseradish peroxidase (HRP)-conjugated secondary antibodies for 1 h at room temperature. The protein bands were visualized with an enhanced chemiluminescence reagent (Millipore, Billerica, MA, USA).

### **Gelatin zymography**

The enzyme activity of secreted MMP2 and MMP9 was measured by gelatin zymography as previously described (Xu TP, Huang MD, Xia R, Liu XX, Sun M, Yin L, Chen WM, Han L, Zhang EB, Kong R, De W, Shu YQ. Decreased expression of the long non-coding RNA FENDRR is associated with poor prognosis in gastric cancer and FENDRR regulates gastric cancer cell metastasis by affecting fibronectin1 expression. *J Hematol Oncol.* 2014 Aug 29;7:63. doi: 10.1186/s13045-014-0063-7.), with several modifications. Briefly, a total of 40 µg of protein from the conditioned medium of GC cells was loaded on 10% SDS-PAGE gels containing 0.1% gelatin (Sigma-Aldrich) under non-reducing conditions. After electrophoresis at 80 V for 2.5 h at 4 °C, the gel was washed twice in 2.5% Triton-X 100 and incubated in developing buffer (50 mM Tris-HCl, pH 7.8, 5 mM CaCl<sub>2</sub>, 0.2M NaCl and 0.02% Brij 35) for 42 h at 37 °C. Subsequently, the gel was stained with 0.5% Coomassie blue R250 (Sigma-Aldrich) and destained in 30% methanol and 10% acetic acid. Gelatinolytic activity was identified as transparent bands on the gel.

### **Statistical analysis**

All the statistical analyses were carried out using SPSS 16.0. Statistical data were presented as the mean ± standard deviation (SD) from at least three replicates. Differences between experimental groups were evaluated by Wilcoxon signed-rank test, one-way analysis of variance or Student's t-test, respectively. Correlations between BC002811 expression and clinicopathological parameters were assessed using Pearson's chi-square test. Kaplan–Meier analysis and log-rank test were utilized to analyze the relationship between BC002811 expression and overall survival (OS). Pearson correlation analyses were carried out to investigate the correlation between BC002811 and PTEN expressions. Differences were considered to be statistically

significant when  $P < 0.05$ .

## Supplementary Figures

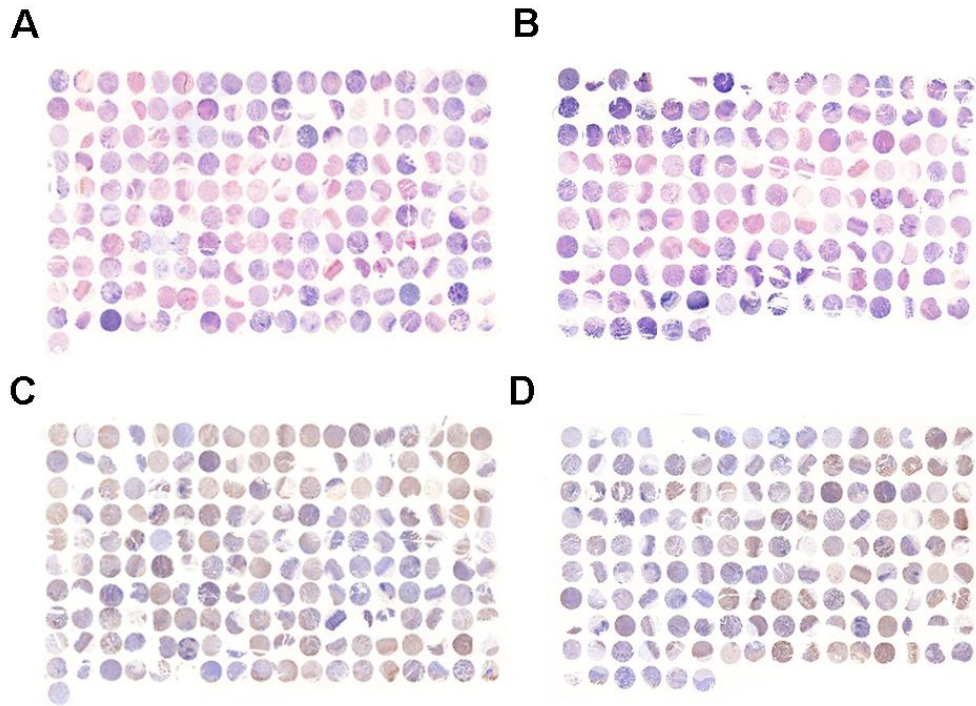

**Figure S1. Overview of the tissue microarray results in GC.** In situ hybridization assays of BC002811 in 90 cases (A) and 75 cases (B) of gastric cancer tissue microarrays. Immunohistochemistry assays of PTEN in 90 cases (C) and 75 cases (D) of gastric cancer tissue microarrays.

## Supplementary Tables

**Table S1. Oligonucleotide sequences and primers for this study.**

|                                   | Name       | Sequence (5'-3')              |
|-----------------------------------|------------|-------------------------------|
| BC002811 siRNA                    | Sense      | CUCCUGACCUCAGUUCAUCdTdT       |
|                                   | Anti-sense | GAUGAACUGAGGUCAGGAGdTdT       |
| Scrambled siRNA                   | Sense      | UUCUCCGAACGUGUCACGUTT         |
|                                   | Anti-sense | ACGUGACACGUUCGGAGAATT         |
| qPCR or RT-PCR primer<br>BC002811 | Sense      | CTTCCAAAGTGCTGGGATTA          |
|                                   | Anti-sense | TCCCAGTTTTATAGTTTTGT          |
| U6 snRNA                          | Sense      | CTCGCTTCGGCAGCACA             |
|                                   | Anti-sense | AACGCTTCACGAATTTGCGT          |
| MMP2                              | Sense      | CTGGAGATAACAATGAGGTGAAG       |
|                                   | Anti-sense | TCTGAGGGTTGGTGGGATTG          |
| MMP9                              | Sense      | GAACCAATCTCACCGACAGG          |
|                                   | Anti-sense | GCCACCCGAGTGTAACCATA          |
| PTEN                              | Sense      | TTGTGGTCTGCCAGCTAAA           |
|                                   | Anti-sense | CGCTCTATACTGCAAATGCT          |
| 18S rRNA                          | Sense      | CCTGGATACCGCAGCTAGGA          |
|                                   | Anti-sense | GCGGCGCAATACGAATGCCCC         |
| GAPDH                             | Sense      | GCTCATTTCAGGGGGGAG            |
|                                   | Anti-sense | GTTGGTGGTGCAGGAGGCA           |
| ISH probe                         | BC002811   | TAAGGTTCTGAGGATGGATAT         |
| RNA-FISH probe                    | BC002811   | CY3-TAAGGTTCTGAGGATGGATAT-CY3 |
| ChIP-qPCR primer<br>PTEN promoter | Sense      | GATACACGCTGGCGACACAA          |
|                                   | Anti-sense | TCGCTCTTTCTTTTGCACC           |

**Table S2. Correlation between BC002811 expression and clinicopathological parameters of gastric cancer.**

| Clinical parameter    | BC002811 |         | Chi-square | P value |
|-----------------------|----------|---------|------------|---------|
|                       | High (n) | Low (n) |            |         |
| All cases             | 82       | 81      |            |         |
| Age                   |          |         | 2.713      | 0.1     |
| <60                   | 31       | 41      |            |         |
| ≥60                   | 51       | 40      |            |         |
| Gender                |          |         | 1.457      | 0.227   |
| male                  | 57       | 49      |            |         |
| female                | 25       | 32      |            |         |
| Tumor size            |          |         | 9.630      | 0.002** |
| <5 cm                 | 23       | 42      |            |         |
| ≥5 cm                 | 59       | 39      |            |         |
| Invasion depth        |          |         | 0.715      | 0.398   |
| T1/T2                 | 13       | 17      |            |         |
| T3/T4                 | 69       | 64      |            |         |
| TNM stage             |          |         | 6.725      | 0.010*  |
| I/II                  | 28       | 44      |            |         |
| III/IV                | 54       | 37      |            |         |
| Lymph node metastasis |          |         | 5.946      | 0.015*  |
| N0/N1                 | 28       | 43      |            |         |
| N2/N3                 | 54       | 38      |            |         |

Clinicopathological parameters were evaluated with Pearson's chi-square test. \* $P < 0.05$ , \*\* $P < 0.01$ .

**Table S3. Differentially metastasis-related mRNA expression profiling by human tumor metastasis qPCR array.**

| Gene symbol | RefSeq    | Ct value  |           |             | Fold Up- or Down-Regulation |                    |
|-------------|-----------|-----------|-----------|-------------|-----------------------------|--------------------|
|             |           | BC002811  | NC        | sh-BC002811 | BC002811 vs. NC             | sh-BC002811 vs. NC |
| APC         | NM_000038 | 24.400797 | 24.0037   | 24.67994    | -1.529478259                | -1.599965504       |
| BRMS1       | NM_015399 | 21.528267 | 21.75821  | 21.598715   | 1.009751578                 | 1.11550285         |
| CCL7        | NM_006273 | 31.278658 | 32.62274  | 30.376188   | 2.185766667                 | 4.739553653        |
| CD44        | NM_000610 | 20.818434 | 20.288452 | 20.673094   | -1.677048718                | -1.307166395       |
| CD82        | NM_002231 | 23.395935 | 24.445812 | 24.4407     | 1.782539937                 | 1.002297785        |
| CDH1        | NM_004360 | 32.069283 | 31.811382 | 34.261272   | -1.38880457                 | -5.470568632       |
| CDH11       | NM_001797 | 31.045656 | 30.951212 | 30.913454   | -1.24003995                 | 1.025236822        |
| CDH6        | NM_004932 | 25.156984 | 24.3489   | 25.331575   | -2.033586841                | -1.978594264       |
| CDKN2A      | NM_000077 | 20.205362 | 20.171194 | 20.32553    | -1.189298286                | -1.114299306       |
| CHD4        | NM_001273 | 18.436754 | 18.564262 | 18.570107   | -1.063215911                | -1.005313733       |
| COL4A2      | NM_001846 | 31.341059 | 34.13883  | 32.661736   | 5.986979789                 | 2.780401445        |
| CST7        | NM_003650 | 29.699316 | 29.493563 | 28.960459   | -1.339500946                | 1.4452341          |
| CTBP1       | NM_001328 | 27.114796 | 26.915947 | 26.814629   | -1.333106094                | 1.071414852        |
| CTNNA1      | NM_001903 | 19.51758  | 19.493656 | 19.654633   | -1.180883465                | -1.119440462       |
| CTSK        | NM_000396 | 20.78995  | 20.50296  | 20.902657   | -1.417091191                | -1.32087853        |
| CTSL        | NM_001912 | 21.643251 | 21.753565 | 21.872078   | -1.075963099                | -1.086971263       |
| CXCL12      | NM_000609 | 35.230354 | 33.339993 | 33.76481    | -3.670431302                | -1.344078872       |
| CXCR2       | NM_001557 | 25.015753 | 24.826986 | 25.360443   | -1.323822411                | -1.449201094       |
| CXCR4       | NM_003467 | 26.21628  | 26.679264 | 26.687954   | 1.186770853                 | -1.007298171       |
| DENR        | NM_003677 | 20.615705 | 20.613712 | 20.881521   | -1.163068123                | -1.205481742       |
| EPHB2       | NM_004442 | 24.628904 | 24.595375 | 24.748638   | -1.188771637                | -1.113470858       |
| ETV4        | NM_001986 | 30.79483  | 31.124884 | 31.78728    | 1.082308213                 | -1.584685776       |
| EWSR1       | NM_005243 | 21.269636 | 21.194498 | 21.341368   | -1.223556396                | -1.108547662       |
| FAT1        | NM_005245 | 20.389057 | 20.104902 | 20.37925    | -1.414309239                | -1.210957976       |
| FGFR4       | NM_002011 | 28.76574  | 29.224815 | 29.33431    | 1.183559635                 | -1.080198013       |
| FLT4        | NM_002020 | 30.521866 | 30.92661  | 30.65032    | 1.139816356                 | 1.209565755        |
| FN1         | NM_002026 | 22.3933   | 22.415754 | 23.21283    | -1.14352555                 | -1.739746132       |
| FXYD5       | NM_014164 | 20.431787 | 20.382574 | 20.402924   | -1.201765657                | -1.015472239       |
| GNRH1       | NM_000825 | 27.469    | 26.812225 | 26.90704    | -1.831108908                | -1.069262298       |
| HGF         | NM_000601 | 29.406118 | 30.351194 | 30.385931   | 1.657643077                 | -1.025649503       |
| HPSE        | NM_006665 | 25.229996 | 25.329588 | 25.475443   | -1.083989363                | -1.107768024       |
| HRAS        | NM_005343 | 21.710443 | 22.202272 | 20.97667    | 1.210737745                 | 2.335612925        |
| HTATIP2     | NM_006410 | 32.167651 | 31.632256 | 32.26264862 | -1.683352834                | -1.549919643       |
| IGF1        | NM_000618 | 25.67241  | 24.510439 | 25.002403   | -2.598922476                | -1.408114646       |
| IL18        | NM_001562 | 31.207802 | 31.900448 | 31.744505   | 1.391560275                 | 1.112759795        |
| IL1B        | NM_000576 | 33.177063 | 31.834532 | 32.553802   | -2.945420472                | -1.648405063       |
| ITGA7       | NM_002206 | 26.120579 | 26.388163 | 26.157919   | 1.036443448                 | 1.171570036        |



|          |           |           |           |           |              |              |
|----------|-----------|-----------|-----------|-----------|--------------|--------------|
| ITGB3    | NM_000212 | 26.646856 | 26.30055  | 26.425827 | -1.476568821 | -1.092079437 |
| KISS1    | NM_002256 | 30.253904 | 30.153698 | 31.82514  | -1.245002466 | -3.189306609 |
| KISS1R   | NM_032551 | 32.504566 | 31.996613 | 32.832355 | -1.651635806 | -1.787003921 |
| KRAS     | NM_004985 | 21.982685 | 21.797384 | 22.186947 | -1.320645814 | -1.311632723 |
| MCAM     | NM_006500 | 22.83348  | 22.984993 | 24.726795 | -1.04567143  | -3.348703864 |
| MDM2     | NM_002392 | 24.871664 | 25.366825 | 25.569256 | 1.213537256  | -1.152072733 |
| MET      | NM_000245 | 25.884682 | 26.434135 | 26.325628 | 1.260075694  | 1.076767074  |
| METAP2   | NM_006838 | 21.641228 | 21.548365 | 22.012276 | -1.238681777 | -1.380998545 |
| MGAT5    | NM_002410 | 26.048311 | 26.265476 | 25.899998 | 1.000847662  | 1.286701318  |
| MMP10    | NM_002425 | 30.356787 | 30.389212 | 30.555023 | -1.135649469 | -1.123197633 |
| MMP11    | NM_005940 | 29.56676  | 29.30755  | 30.104929 | -1.390065245 | -1.740111558 |
| MMP13    | NM_002427 | UND       | 33.620632 | 34.553673 | N/A          | -1.911680997 |
| MMP2     | NM_004530 | 19.772665 | 21.158667 | 22.292572 | 2.250209615  | -2.197260316 |
| MMP3     | NM_002422 | UND       | 34.17379  | UND       | N/A          | N/A          |
| MMP7     | NM_002423 | 38.644024 | 39.93651  | UND       | -1.16146252  | N/A          |
| MMP9     | NM_004994 | 28.648964 | 29.884037 | 31.50213  | 2.026696978  | -3.073524105 |
| MTA1     | NM_004689 | 22.078983 | 21.922129 | 22.015024 | -1.294860429 | -1.067840224 |
| MTSS1    | NM_014751 | 20.833866 | 20.29662  | 20.22868  | -1.685513988 | 1.046911289  |
| MYC      | NM_002467 | 18.307337 | 17.989698 | 18.151814 | -1.447518313 | -1.120324603 |
| MYCL     | NM_005376 | 33.5963   | 34.099674 | 33.142902 | 1.220465404  | 1.938540935  |
| NF2      | NM_000268 | 24.987833 | 26.724075 | 26.74648  | 2.86850573   | -1.016919726 |
| NME1     | NM_000269 | 17.784332 | 17.707243 | 17.998276 | -1.225212168 | -1.225044197 |
| NME4     | NM_005009 | 25.994476 | 25.650154 | 25.782202 | -1.474539633 | -1.097216939 |
| NR4A3    | NM_006981 | 30.522398 | 29.604443 | 30.4792   | -2.194508107 | -1.83598949  |
| PLAUR    | NM_002659 | 25.643324 | 25.433584 | 25.659914 | -1.343207881 | -1.171316372 |
| PNN      | NM_002687 | 19.84218  | 19.559113 | 20.276146 | -1.413243048 | -1.645851076 |
| PTEN     | NM_000314 | 26.048985 | 24.472029 | 23.152548 | -3.465103872 | 2.492649785  |
| RB1      | NM_000321 | 21.942163 | 21.634604 | 22.126963 | -1.437439863 | -1.408500231 |
| RORB     | NM_006914 | 30.431238 | 29.125437 | 29.443459 | -2.871378666 | -1.248177231 |
| RPSA     | NM_002295 | 14.527325 | 14.513866 | 14.608362 | -1.172348582 | -1.069025895 |
| SERPINE1 | NM_000602 | 26.185825 | 26.123827 | 26.248543 | -1.212462897 | -1.091654858 |
| SET      | NM_003011 | 17.3959   | 17.319386 | 17.62882  | -1.224723945 | -1.240769218 |
| SMAD2    | NM_005901 | 20.439754 | 20.280413 | 20.460062 | -1.297094508 | -1.134022921 |
| SMAD4    | NM_005359 | 21.692614 | 21.518116 | 21.676344 | -1.31079366  | -1.117309442 |
| SRC      | NM_005417 | 26.2672   | 26.39584  | 26.731773 | -1.062381994 | -1.263769891 |
| SSTR2    | NM_001050 | 24.063967 | 24.063484 | 23.803364 | -1.161851432 | 1.196084404  |
| SYK      | NM_003177 | 36.477234 | 35.868095 | 35.229908 | -1.16146252  | -1.001248999 |
| TCF20    | NM_005650 | 23.014574 | 23.001215 | 23.190908 | -1.172267324 | -1.141945501 |
| TGFB1    | NM_000660 | 20.627523 | 20.722246 | 20.540184 | -1.087653936 | 1.133089013  |
| TIMP2    | NM_003255 | 18.30532  | 18.386501 | 18.230337 | -1.097911373 | 1.112930267  |
| TIMP3    | NM_000362 | 21.487204 | 21.467165 | 21.233364 | -1.177707769 | 1.174462134  |
| TIMP4    | NM_003256 | 34.246433 | 36.016335 | 34.927757 | 1.451580317  | 1.050038481  |
| TNFSF10  | NM_003810 | 27.055523 | 28.954768 | 28.591997 | 3.211622665  | 1.284289281  |
| TP53     | NM_000546 | 25.36515  | 25.49461  | 25.268162 | -1.061778328 | 1.168491468  |

|       |           |           |           |           |              |              |
|-------|-----------|-----------|-----------|-----------|--------------|--------------|
| TRPM1 | NM_002420 | UND       | UND       | UND       | N/A          | N/A          |
| TSHR  | NM_000369 | 30.496893 | 29.832523 | 30.229504 | -1.840774113 | -1.318394199 |
| VEGFA | NM_003376 | 19.735508 | 19.670408 | 19.42233  | -1.21507267  | 1.186142383  |
| ACTB  | NM_001101 | 13.786638 | 14.344679 | 13.845302 | 1.267598977  | 1.411839607  |
| B2M   | NM_004048 | 17.790333 | 17.898544 | 17.962105 | -1.077532661 | -1.046347311 |
| GAPDH | NM_002046 | 13.288732 | 13.603623 | 13.804002 | 1.070992517  | -1.150435261 |
| HPRT1 | NM_000194 | 20.33128  | 20.566963 | 20.677183 | 1.013777043  | -1.080740983 |
| RPLP0 | NM_001002 | 13.879562 | 13.742449 | 13.858662 | -1.277262983 | -1.085239753 |
| HGDC  | SA_00105  | UND       | UND       | UND       |              |              |
| RTC   | SA_00104  | UND       | UND       | UND       |              |              |
| RTC   | SA_00104  | UND       | UND       | UND       |              |              |
| RTC   | SA_00104  | UND       | UND       | UND       |              |              |
| PPC   | SA_00103  | 18.909622 | 19.241392 | 18.934938 |              |              |
| PPC   | SA_00103  | 18.753391 | 19.025349 | 18.942236 |              |              |
| PPC   | SA_00103  | 18.95349  | 18.977577 | 18.77811  |              |              |

HGDC represents the human genomic DNA contamination.

RTC is used as reverse transcription control.

PPC is used as positive PCR control.

N/A, not available.

UND, Undetermined.

**Table S4. Mass spectrometry analysis of a specific protein band pulled down by lncRNA BC002811.**

| Protein ID | Protein Name                                   | Gene Symbol | UnusedScore | Peptides* |
|------------|------------------------------------------------|-------------|-------------|-----------|
| P48431     | Transcription factor SOX-2                     | SOX2        | 280.37      | 559       |
| P08670     | Vimentin                                       | VIM         | 119.88      | 144       |
| P04264     | Keratin, type II cytoskeletal 1                | KRT1        | 61.30       | 55        |
| P13645     | Keratin, type I cytoskeletal 10                | KRT10       | 39.32       | 34        |
| P35527     | Keratin, type I cytoskeletal 9                 | KRT9        | 37.73       | 38        |
| P02533     | Keratin, type I cytoskeletal 14                | KRT14       | 30.16       | 25        |
| P35908     | Keratin, type II cytoskeletal 2 epidermal      | KRT2        | 21.18       | 22        |
| P48668     | Keratin, type II cytoskeletal 6C               | KRT6C       | 13.74       | 22        |
| P16403     | Histone H1.2                                   | HIST1H1C    | 13.60       | 13        |
| P07477     | Trypsin-1                                      | PRSS1       | 13.06       | 18        |
| P07910     | Heterogeneous nuclear ribonucleoproteins C1/C2 | HNRNPC      | 7.87        | 8         |
| P08779     | Keratin, type I cytoskeletal 16                | KRT16       | 7.47        | 20        |
| P38646     | Stress-70 protein, mitochondrial               | HSPA9       | 7.09        | 3         |
| P63261     | Actin, cytoplasmic 2                           | ACTG1       | 6.85        | 5         |
| P05787     | Keratin, type II cytoskeletal 8                | KRT8        | 6.33        | 10        |
| Q86YZ3     | Hornerin                                       | HRNR        | 4.70        | 3         |
| P13647     | Keratin, type II cytoskeletal 5                | KRT5        | 4.40        | 17        |
| P06576     | ATP synthase subunit beta, mitochondrial       | ATP5F1B     | 4.26        | 2         |
| P05783     | Keratin, type I cytoskeletal 18                | KRT18       | 4.13        | 6         |
| O14979     | Heterogeneous nuclear ribonucleoprotein D-like | HNRNPDL     | 3.71        | 3         |
| P02768     | Serum albumin                                  | ALB         | 3.66        | 3         |
| P22626     | Heterogeneous nuclear ribonucleoproteins A2/B1 | HNRNPA2B1   | 3.41        | 5         |
| P30050     | 60S ribosomal protein L12                      | RPL12       | 3.16        | 2         |
| Q04695     | Keratin, type I cytoskeletal 17                | KRT17       | 2.91        | 14        |
| P07197     | Neurofilament medium polypeptide               | NEFM        | 2.74        | 4         |

\* Number of peptides with >95% confidence score used for quantitation.
